# Supplementary material for: Genomic Characterization of the LEED..PEEDs, a Gene Family Unique to the Medicago Lineage
Source: PubMed Central journal article supplement (PMC4199706; doi:10.1534/g3.114.011874), 2014-08-25
Supplement: supp_g3.114.011874_FigureS1.pdf [file supp_g3.114.011874_FigureS1.pdf]

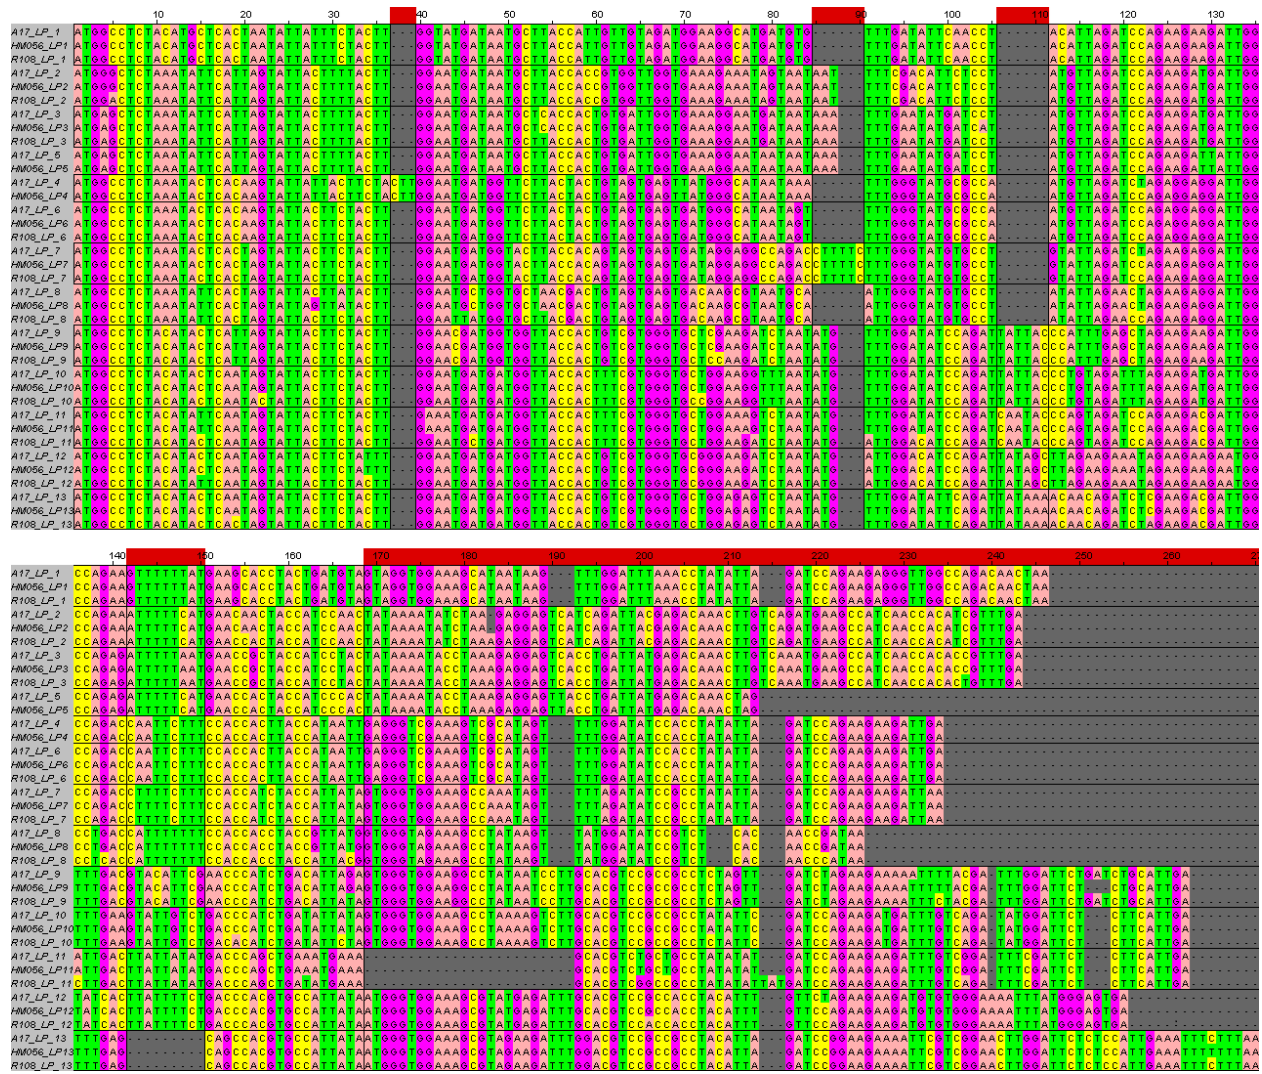

**Figure S1** Aligned LP DNA sequences from A17, HM056 and R108. Columns that were omitted for the phylogenetic analysis are highlighted with red headers. Phylogenetic trees were based on the remaining 144 nucleotides.
