# Supplementary material for: Genomic Characterization of the LEED..PEEDs, a Gene Family Unique to the Medicago Lineage
Source: PubMed Central journal article supplement (PMC4199706; doi:10.1534/g3.114.011874), 2014-08-25
Supplement: supp_g3.114.011874_FigureS2.pdf [file supp_g3.114.011874_FigureS2.pdf]

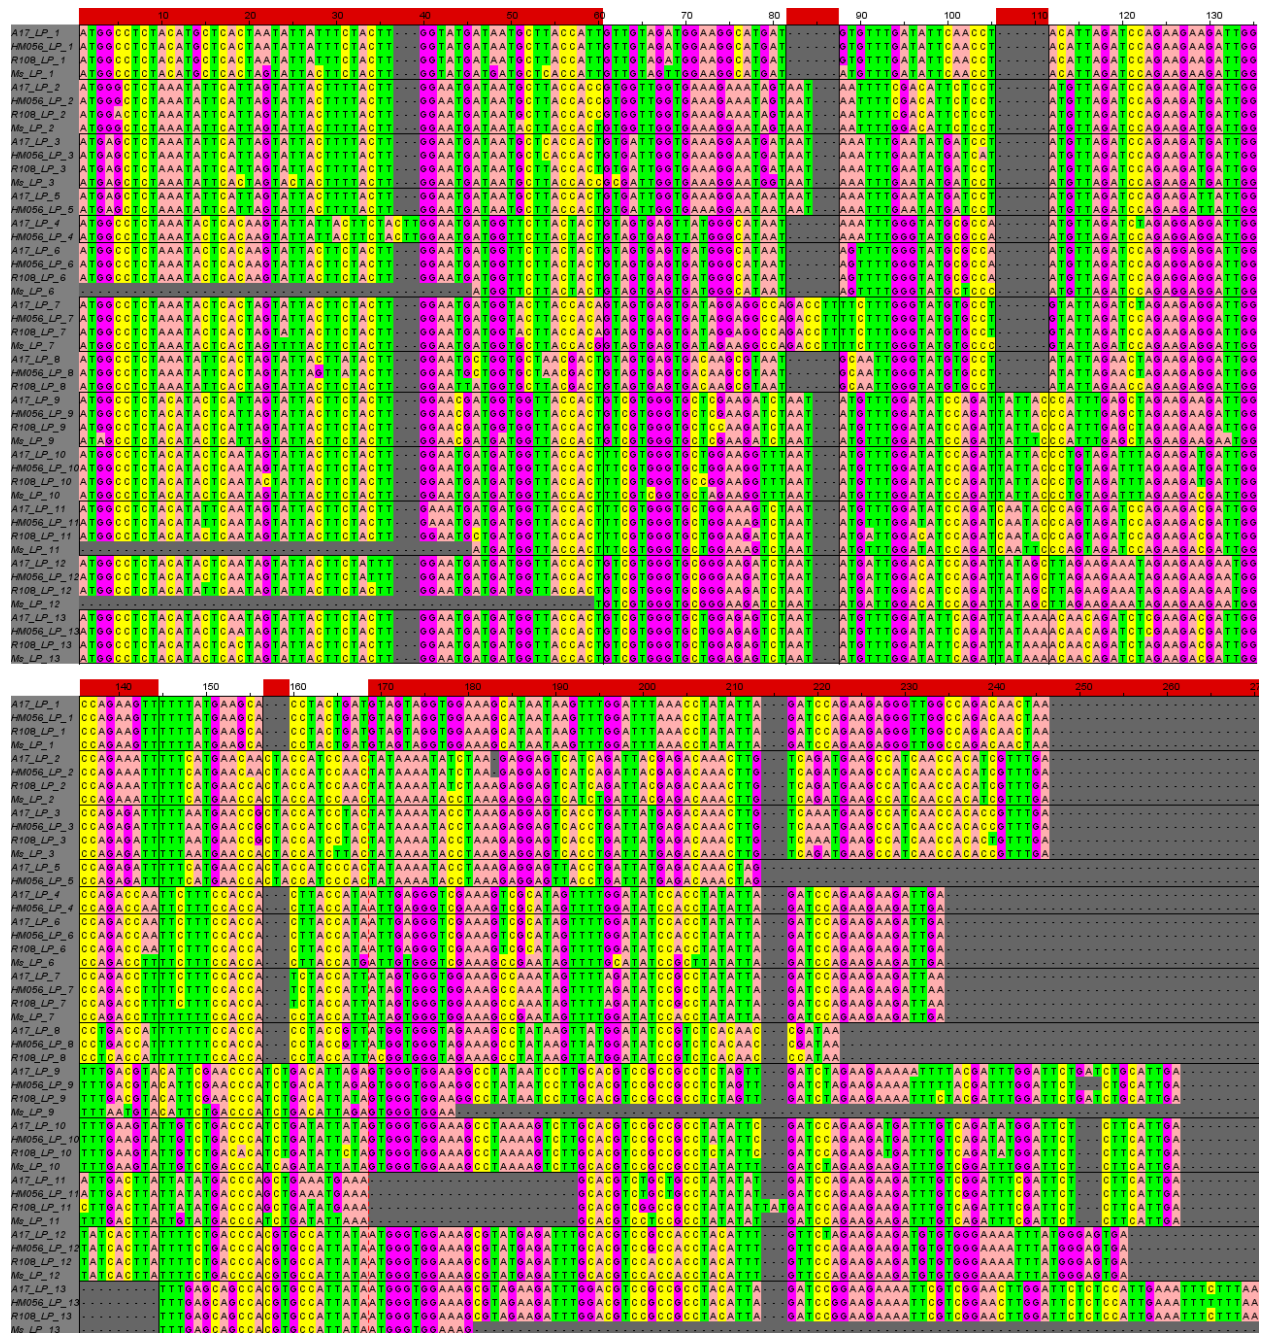

**Figure S2** Aligned LP DNA sequences from A17, HM056, R108 and *M. sativa*. Columns that were omitted for the phylogenetic analysis are highlighted with red headers. Phylogenetic trees were based on the remaining 87 nucleotides.
