# Supplementary material for: Genomic Characterization of the LEED..PEEDs, a Gene Family Unique to the Medicago Lineage
Source: PubMed Central journal article supplement (PMC4199706; doi:10.1534/g3.114.011874), 2014-08-25
Supplement: supp_g3.114.011874_FigureS3.pdf [file supp_g3.114.011874_FigureS3.pdf]

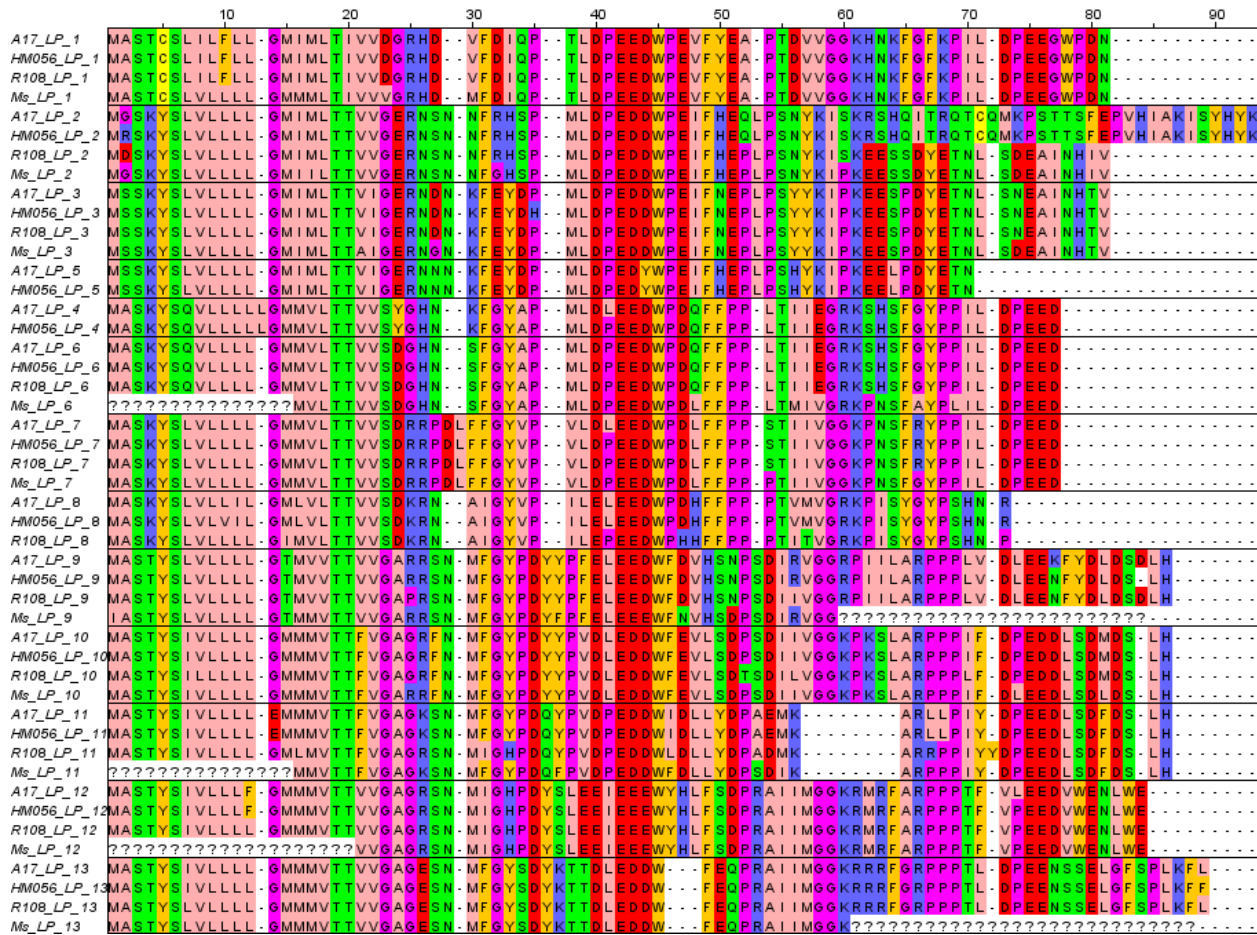

**Figure S3** Multiple sequence alignment of LPs from *M. truncatula* accessions A17 and HM056, R108 and *M. sativa*. Unknown *M. sativa* residues are indicated with “?”.
