# Supplementary material for: Genomic Characterization of the LEED..PEEDs, a Gene Family Unique to the Medicago Lineage
Source: PubMed Central journal article supplement (PMC4199706; doi:10.1534/g3.114.011874), 2014-08-25
Supplement: supp_g3.114.011874_FigureS5.pdf [file supp_g3.114.011874_FigureS5.pdf]

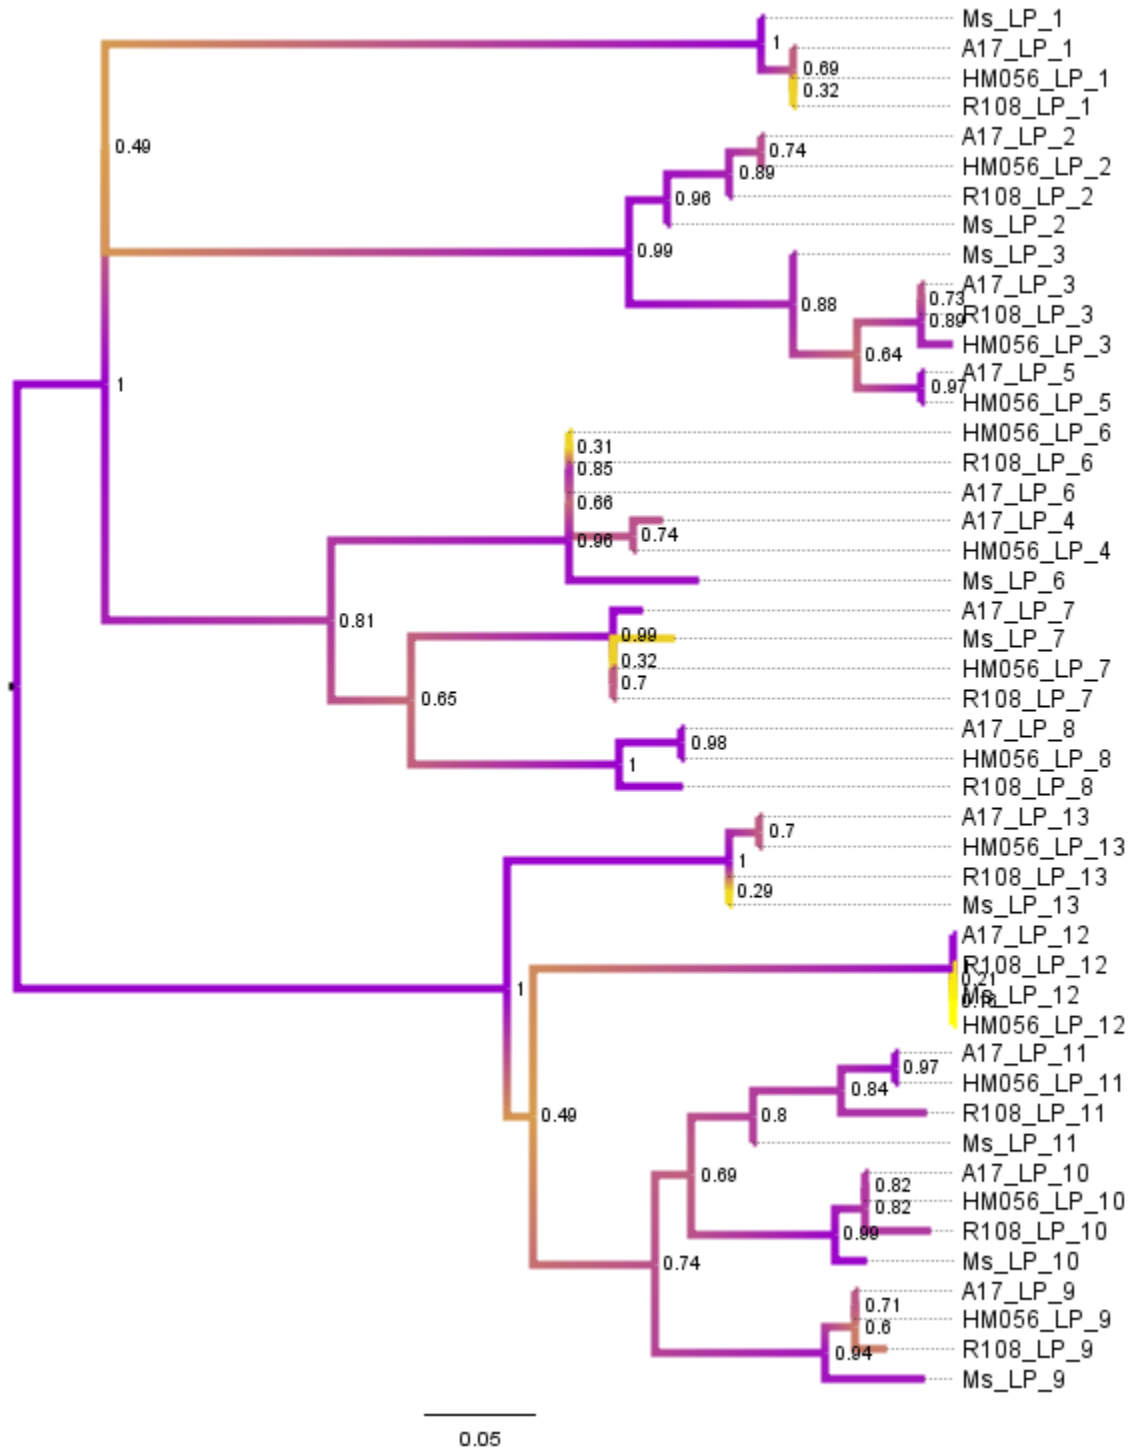

**Figure S5 Phylogenetic tree of A17, HM056, R108 and *M. sativa* LP nucleotide sequences.** The tree was generated through Bayesian Inference and visualized with FigTree software. Posterior probability values of the clades are indicated at the nodes.
